# Supplementary material for: Malaria infection changes the ability of splenic dendritic cell populations to stimulate antigen-specific T cells
Source: PubMed Central journal article supplement — J Exp Med. 2006 Jun 12;203(6):1427–33. doi: 10.1084/jem.20052450 (PMC2118320; doi:10.1084/jem.20052450), 2006-06-12
Supplement: jexpmed_jem.20052450_6.pdf [file jexpmed_jem.20052450_6.pdf]

**Sponaas et al.**, <http://www.jem.org/cgi/content/full/jem.20052450/DC1>**Histology**

Spleen sections from *P. chabaudi*-infected and naive mice were prepared, stained with Abs, and analyzed as described previously (1). Abs for histology were hamster anti-mouse CD11c AlexaFluor488 (Caltag), rat anti-mouse Thy1.2 biotin, rat anti-mouse CD8a (BD Biosciences), sheep anti-mouse IgD (The Binding Site), chicken anti-rat AlexaFluor647, donkey anti-sheep AlexaFluor568, and Neutravidin Texas red (Cambridge Bioscience). The sections were analyzed by confocal microscopy (SP1; Leica) using LCS software and an HC PL APO CS 20.0 × 0.70 UV objective.

**REFERENCES**

1. Achtman, A.H., M. Khan, I.C. MacLennan, and J. Langhorne. 2003. *Plasmodium chabaudi chabaudi* infection in mice induces strong B cell responses and striking but temporary changes in splenic cell distribution. *J. Immunol.* 171:317–324.
